# Supplementary material for: Clinical education and student satisfaction: An integrative literature review
Source: PubMed Central journal article supplement — Int J Nurs Sci. 2017 Mar 11;4(2):205–13. doi: 10.1016/j.ijnss.2017.03.004 (PMC6626144; doi:10.1016/j.ijnss.2017.03.004), 2017-03-11
Supplement: mmc1.pdf [file mmc1.pdf]

# 临床教学与学生满意度：文献综述

Karen Phillips, Lizy Mathew, Nadine Aktan, Bryant Catano

**【摘要】** 本科临床教育的临床教学部分是护理教育的一个关键领域。师资短缺使临床教师招聘及临床教学更具挑战性。为了解决师资短缺的问题，相关人员对各类临床师资替代解决模式进行了探索。本文对多种临床教育模式和学生对临床环境满意度的相关研究进行了广泛的文献回顾，目的是对采用临床学习环境调查表（Clinical Learning Environment Inventory, CLEI）调查的学生对临床学习环境满意度及不同层次护理专业本科生教育的临床师资替代模式应用进行评估。从 5 个电子数据库中查找了 2002 年—2015 年发表的研究。共检索到 35 篇文献，选取了其中的 22 篇进行文献综述。这些文献提示，学生喜欢比目前他们所感知到的实际临床环境更积极和更有利的临床学习环境。支持性的临床学习环境对于保证积极的教学效果至关重要。护理教育工作者可以参考本文综述的结果，保障高质量的临床教学，推进积极的、以学生为中心的临床学习环境建设。

**【关键词】** 临床；临床学习环境；教育；学生满意度

通信作者：Karen Phillips, E-mail: phillipsk116@wpunj.edu
